# Supplementary material for: Imaging and modelling of poly(3-hydroxybutyrate) synthesis in Paracoccus denitrificans
Source: AMB Express. 2021 Aug 9;11:113. doi: 10.1186/s13568-021-01273-x (PMC8353029; doi:10.1186/s13568-021-01273-x)
Supplement: Supplementary file 2 — Additional file 2:File S1. Excel with the list of these enzymes mentioned in the text. [file 13568_2021_1273_MOESM2_ESM.xlsx]

## Sheet: Title page
				Imaging and modelling of poly(3-hydroxybutyrate) synthesis in Paracoccus denitrificans
				Sergio Bordel1,2, Rob J. M. van Spanning3, Fernando Santos-Beneit*1,2,3
				1. Department of Chemical Engineering and Environmental Technology, School of Industrial Engineering, University of Valladolid, Dr. Mergelina, s/n, 47011 Valladolid, Spain
				2. Institute of Sustainable Processes, Dr. Mergelina s/n, 47011 Valladolid, Spain
				3. Department of Molecular Cell Biology, Faculty of Science, Vrije Universiteit Amsterdam, The Netherlands
				* fernando.santos.beneit@uva.es

## Sheet: PHB accumulation phase
6666666.653812.peg.5040	TRAP-type C4-dicarboxylate transport system, periplasmic component
6666666.653812.peg.1596	TRAP-type C4-dicarboxylate transport system, periplasmic component
6666666.653812.peg.4720	TRAP-type C4-dicarboxylate transport system, periplasmic component
6666666.653812.peg.5248	TRAP-type C4-dicarboxylate transport system, periplasmic component
6666666.653812.peg.4277	TRAP-type C4-dicarboxylate transport system, periplasmic component
6666666.653812.peg.3649	TRAP-type C4-dicarboxylate transport system, periplasmic component
6666666.653812.peg.3490	TRAP-type C4-dicarboxylate transport system, periplasmic component
6666666.653812.peg.3587	TRAP-type C4-dicarboxylate transport system, periplasmic component
6666666.653812.peg.5002	TRAP-type C4-dicarboxylate transport system, periplasmic component
6666666.653812.peg.582	Succinate dehydrogenase flavoprotein subunit (EC 1.3.5.1)
6666666.653812.peg.3111	Succinate dehydrogenase iron-sulfur protein (EC 1.3.5.1)
6666666.653812.peg.585	Succinate dehydrogenase iron-sulfur protein (EC 1.3.5.1)
6666666.653812.peg.203	Enoyl-CoA hydratase (EC 4.2.1.17) / Delta(3)-cis-delta(2)-trans-enoyl-CoA isomerase (EC 5.3.3.8) / 3-hydroxyacyl-CoA dehydrogenase (EC 1.1.1.35) / 3-hydroxybutyryl-CoA epimerase (EC 5.1.2.3)
6666666.653812.peg.2992	3-ketoacyl-CoA thiolase (EC 2.3.1.16)
6666666.653812.peg.5004	3-ketoacyl-CoA thiolase (EC 2.3.1.16)
6666666.653812.peg.4151	Cytochrome d ubiquinol oxidase subunit II (EC 1.10.3.-)
6666666.653812.peg.4150	Cytochrome d ubiquinol oxidase subunit I (EC 1.10.3.-)
6666666.653812.peg.1951	Fumarate hydratase class II (EC 4.2.1.2)
6666666.653812.peg.4274	Fumarate hydratase class I, aerobic (EC 4.2.1.2)
6666666.653812.peg.2280	NADP-dependent malic enzyme (EC 1.1.1.40)
6666666.653812.peg.872	NADP-dependent malic enzyme (EC 1.1.1.40)
6666666.653812.peg.1982	Cytochrome c oxidase polypeptide I (EC 1.9.3.1)
6666666.653812.peg.3117	Cytochrome c oxidase polypeptide I (EC 1.9.3.1)
6666666.653812.peg.4484	Cytochrome c oxidase polypeptide II (EC 1.9.3.1)
6666666.653812.peg.4480	Cytochrome c oxidase polypeptide III (EC 1.9.3.1)
6666666.653812.peg.2287	NADH-ubiquinone oxidoreductase chain N (EC 1.6.5.3)
6666666.653812.peg.2306	NADH-ubiquinone oxidoreductase chain D (EC 1.6.5.3)
6666666.653812.peg.2298	NADH-ubiquinone oxidoreductase chain G (EC 1.6.5.3)
6666666.653812.peg.2308	NADH-ubiquinone oxidoreductase chain B (EC 1.6.5.3)
6666666.653812.peg.2302	NADH-ubiquinone oxidoreductase chain F (EC 1.6.5.3)
6666666.653812.peg.2307	NADH-ubiquinone oxidoreductase chain C (EC 1.6.5.3)
6666666.653812.peg.2296	NADH-ubiquinone oxidoreductase chain H (EC 1.6.5.3)
6666666.653812.peg.2290	NADH-ubiquinone oxidoreductase chain K (EC 1.6.5.3)
6666666.653812.peg.2294	NADH-ubiquinone oxidoreductase chain I (EC 1.6.5.3)
6666666.653812.peg.2289	NADH-ubiquinone oxidoreductase chain L (EC 1.6.5.3)
6666666.653812.peg.2304	NADH-ubiquinone oxidoreductase chain E (EC 1.6.5.3)
6666666.653812.peg.2305	NADH-ubiquinone oxidoreductase chain E (EC 1.6.5.3)
6666666.653812.peg.2309	NADH ubiquinone oxidoreductase chain A (EC 1.6.5.3)
6666666.653812.peg.2288	NADH-ubiquinone oxidoreductase chain M (EC 1.6.5.3)
6666666.653812.peg.2291	NADH-ubiquinone oxidoreductase chain J (EC 1.6.5.3)
6666666.653812.peg.674	Ferredoxin--NADP(+) reductase (EC 1.18.1.2) @ Flavodoxin--NADP(+) reductase (EC 1.19.1.1)
6666666.653812.peg.2959	ATP synthase F0 sector subunit b (EC 3.6.3.14)
6666666.653812.peg.2960	ATP synthase F0 sector subunit b' (EC 3.6.3.14)
6666666.653812.peg.2961	ATP synthase F0 sector subunit c (EC 3.6.3.14)
6666666.653812.peg.2962	ATP synthase F0 sector subunit a (EC 3.6.3.14)
6666666.653812.peg.2963	ATP synthase protein I
6666666.653812.peg.4025	Dihydrolipoamide acetyltransferase component of pyruvate dehydrogenase complex (EC 2.3.1.12)
6666666.653812.peg.4026	Pyruvate dehydrogenase E1 component beta subunit (EC 1.2.4.1)
6666666.653812.peg.4027	Pyruvate dehydrogenase E1 component alpha subunit (EC 1.2.4.1)
6666666.653812.peg.5152	D-malate dehydrogenase [decarboxylating] (EC 1.1.1.83)

## Sheet: exponential growth phase
6666666.653812.peg.4098	Glutathione synthetase (EC 6.3.2.3)
6666666.653812.peg.2928	Glutamate--cysteine ligase (EC 6.3.2.2)
6666666.653812.peg.5040	TRAP-type C4-dicarboxylate transport system, periplasmic component
6666666.653812.peg.1596	TRAP-type C4-dicarboxylate transport system, periplasmic component
6666666.653812.peg.4720	TRAP-type C4-dicarboxylate transport system, periplasmic component
6666666.653812.peg.5248	TRAP-type C4-dicarboxylate transport system, periplasmic component
6666666.653812.peg.4277	TRAP-type C4-dicarboxylate transport system, periplasmic component
6666666.653812.peg.3649	TRAP-type C4-dicarboxylate transport system, periplasmic component
6666666.653812.peg.3490	TRAP-type C4-dicarboxylate transport system, periplasmic component
6666666.653812.peg.3587	TRAP-type C4-dicarboxylate transport system, periplasmic component
6666666.653812.peg.5002	TRAP-type C4-dicarboxylate transport system, periplasmic component
6666666.653812.peg.2031	Dihydroxy-acid dehydratase (EC 4.2.1.9)
6666666.653812.peg.3018	Dihydroxy-acid dehydratase (EC 4.2.1.9)
6666666.653812.peg.4288	L-serine dehydratase, beta subunit (EC 4.3.1.17) / L-serine dehydratase, alpha subunit (EC 4.3.1.17)
6666666.653812.peg.3775	Manganese-dependent inorganic pyrophosphatase (EC 3.6.1.1)
6666666.653812.peg.888	Aspartokinase (EC 2.7.2.4)
6666666.653812.peg.3743	Porphobilinogen deaminase (EC 2.5.1.61)
6666666.653812.peg.803	Adenylate kinase (EC 2.7.4.3)
6666666.653812.peg.2685	Methenyltetrahydrofolate cyclohydrolase (EC 3.5.4.9) / Methylenetetrahydrofolate dehydrogenase (NADP+) (EC 1.5.1.5)
6666666.653812.peg.5086	Methenyltetrahydrofolate cyclohydrolase (EC 3.5.4.9) / Methylenetetrahydrofolate dehydrogenase (NADP+) (EC 1.5.1.5)
6666666.653812.peg.4468	Triosephosphate isomerase (EC 5.3.1.1)
6666666.653812.peg.509	Threonine dehydratase biosynthetic (EC 4.3.1.19)
6666666.653812.peg.3733	Adenine phosphoribosyltransferase (EC 2.4.2.7)
6666666.653812.peg.1917	S-adenosylmethionine synthetase (EC 2.5.1.6)
6666666.653812.peg.1736	Fructose-bisphosphate aldolase class II (EC 4.1.2.13)
6666666.653812.peg.1599	Adenosylcobinamide kinase (EC 2.7.1.156) / Adenosylcobinamide-phosphate guanylyltransferase (EC 2.7.7.62)
6666666.653812.peg.880	Xanthine-guanine phosphoribosyltransferase (EC 2.4.2.22)
6666666.653812.peg.538	Purine nucleoside phosphorylase (EC 2.4.2.1)
6666666.653812.peg.2359	3'(2'),5'-bisphosphate nucleotidase (EC 3.1.3.7)
6666666.653812.peg.2798	IMP cyclohydrolase (EC 3.5.4.10) / Phosphoribosylaminoimidazolecarboxamide formyltransferase (EC 2.1.2.3)
6666666.653812.peg.5297	Alkaline phosphatase (EC 3.1.3.1)
6666666.653812.peg.4062	Phosphoribosylglycinamide formyltransferase (EC 2.1.2.2)
6666666.653812.peg.4565	Aerobic glycerol-3-phosphate dehydrogenase (EC 1.1.5.3)
6666666.653812.peg.2071	Diaminopimelate decarboxylase (EC 4.1.1.20)
6666666.653812.peg.1328	Diaminopimelate decarboxylase (EC 4.1.1.20)
6666666.653812.peg.3745	Alpha-ribazole-5'-phosphate phosphatase (EC 3.1.3.73)
6666666.653812.peg.1794	Coproporphyrinogen III oxidase, aerobic (EC 1.3.3.3)
6666666.653812.peg.1597	Cobalamin synthase (EC 2.7.8.26)
6666666.653812.peg.2279	Cytidine deaminase (EC 3.5.4.5)
6666666.653812.peg.4061	Phosphoribosylformylglycinamidine cyclo-ligase (EC 6.3.3.1)
6666666.653812.peg.2624	Uroporphyrinogen-III methyltransferase (EC 2.1.1.107)
6666666.653812.peg.2553	Uroporphyrinogen-III methyltransferase (EC 2.1.1.107)
6666666.653812.peg.1788	Nucleoside diphosphate kinase (EC 2.7.4.6)
6666666.653812.peg.582	Succinate dehydrogenase flavoprotein subunit (EC 1.3.5.1)
6666666.653812.peg.3111	Succinate dehydrogenase iron-sulfur protein (EC 1.3.5.1)
6666666.653812.peg.585	Succinate dehydrogenase iron-sulfur protein (EC 1.3.5.1)
6666666.653812.peg.1313	Transketolase (EC 2.2.1.1)
6666666.653812.peg.1735	Transketolase (EC 2.2.1.1)
6666666.653812.peg.4532	Dihydrofolate reductase (EC 1.5.1.3)
6666666.653812.peg.569	2-oxoglutarate dehydrogenase E1 component (EC 1.2.4.2)
6666666.653812.peg.568	Dihydrolipoamide succinyltransferase component (E2) of 2-oxoglutarate dehydrogenase complex (EC 2.3.1.61)
6666666.653812.peg.4132	Uridylate kinase (EC 2.7.4.22)
6666666.653812.peg.4071	Guanylate kinase (EC 2.7.4.8)
6666666.653812.peg.4674	Homoserine O-succinyltransferase (EC 2.3.1.46)
6666666.653812.peg.1127	Aspartate ammonia-lyase (EC 4.3.1.1)
6666666.653812.peg.968	Aspartate ammonia-lyase (EC 4.3.1.1)
6666666.653812.peg.203	Enoyl-CoA hydratase (EC 4.2.1.17) / Delta(3)-cis-delta(2)-trans-enoyl-CoA isomerase (EC 5.3.3.8) / 3-hydroxyacyl-CoA dehydrogenase (EC 1.1.1.35) / 3-hydroxybutyryl-CoA epimerase (EC 5.1.2.3)
6666666.653812.peg.4032	Deoxyribose-phosphate aldolase (EC 4.1.2.4)
6666666.653812.peg.3942	Porphobilinogen synthase (EC 4.2.1.24)
6666666.653812.peg.3924	Tryptophan synthase beta chain (EC 4.2.1.20)
6666666.653812.peg.341	Tryptophan synthase alpha chain (EC 4.2.1.20)
6666666.653812.peg.2652	Ferrochelatase, protoheme ferro-lyase (EC 4.99.1.1)
6666666.653812.peg.1465	Thioredoxin reductase (EC 1.8.1.9)
6666666.653812.peg.3215	Thioredoxin reductase (EC 1.8.1.9)
6666666.653812.peg.2263	Thioredoxin reductase (EC 1.8.1.9)
6666666.653812.peg.1464	Thioredoxin reductase (EC 1.8.1.9)
6666666.653812.peg.1368	Thioredoxin reductase (EC 1.8.1.9)
6666666.653812.peg.2881	4-hydroxy-tetrahydrodipicolinate reductase (EC 1.17.1.8)
6666666.653812.peg.4636	Adenylosuccinate lyase (EC 4.3.2.2) @ SAICAR lyase (EC 4.3.2.2)
6666666.653812.peg.4175	2-isopropylmalate synthase (EC 2.3.3.13)
6666666.653812.peg.2335	Pyruvate kinase (EC 2.7.1.40)
6666666.653812.peg.2047	Uroporphyrinogen-III synthase (EC 4.2.1.75)
6666666.653812.peg.534	Lead, cadmium, zinc and mercury transporting ATPase (EC 3.6.3.3) (EC 3.6.3.5); Copper-translocating P-type ATPase (EC 3.6.3.4)
6666666.653812.peg.2403	Lead, cadmium, zinc and mercury transporting ATPase (EC 3.6.3.3) (EC 3.6.3.5); Copper-translocating P-type ATPase (EC 3.6.3.4)
6666666.653812.peg.1884	Type cbb3 cytochrome oxidase biogenesis protein CcoI; Copper-translocating P-type ATPase (EC 3.6.3.4)
6666666.653812.peg.214	Lead, cadmium, zinc and mercury transporting ATPase (EC 3.6.3.3) (EC 3.6.3.5); Copper-translocating P-type ATPase (EC 3.6.3.4)
6666666.653812.peg.3394	Lead, cadmium, zinc and mercury transporting ATPase (EC 3.6.3.3) (EC 3.6.3.5); Copper-translocating P-type ATPase (EC 3.6.3.4)
6666666.653812.peg.3396	Lead, cadmium, zinc and mercury transporting ATPase (EC 3.6.3.3) (EC 3.6.3.5); Copper-translocating P-type ATPase (EC 3.6.3.4)
6666666.653812.peg.2992	3-ketoacyl-CoA thiolase (EC 2.3.1.16)
6666666.653812.peg.5004	3-ketoacyl-CoA thiolase (EC 2.3.1.16)
6666666.653812.peg.1977	O-acetylhomoserine sulfhydrylase (EC 2.5.1.49) @ O-succinylhomoserine sulfhydrylase (EC 2.5.1.48)
6666666.653812.peg.4461	O-acetylhomoserine sulfhydrylase (EC 2.5.1.49) @ O-succinylhomoserine sulfhydrylase (EC 2.5.1.48)
6666666.653812.peg.2658	3-demethylubiquinol 3-O-methyltransferase (EC 2.1.1.64) @ 2-polyprenyl-6-hydroxyphenyl methylase (EC 2.1.1.222)
6666666.653812.peg.2858	Aspartate-semialdehyde dehydrogenase (EC 1.2.1.11)
6666666.653812.peg.4151	Cytochrome d ubiquinol oxidase subunit II (EC 1.10.3.-)
6666666.653812.peg.4150	Cytochrome d ubiquinol oxidase subunit I (EC 1.10.3.-)
6666666.653812.peg.3170	Succinyl-CoA ligase [ADP-forming] alpha chain (EC 6.2.1.5)
6666666.653812.peg.572	Succinyl-CoA ligase [ADP-forming] beta chain (EC 6.2.1.5)
6666666.653812.peg.571	Succinyl-CoA ligase [ADP-forming] alpha chain (EC 6.2.1.5)
6666666.653812.peg.620	Adenylosuccinate synthetase (EC 6.3.4.4)
6666666.653812.peg.1979	5-methyltetrahydrofolate--homocysteine methyltransferase (EC 2.1.1.13)
6666666.653812.peg.511	Argininosuccinate synthase (EC 6.3.4.5)
6666666.653812.peg.500	Glutamate synthase [NADPH] large chain (EC 1.4.1.13)
6666666.653812.peg.502	Glutamate synthase [NADPH] small chain (EC 1.4.1.13)
6666666.653812.peg.3742	Uroporphyrinogen III decarboxylase (EC 4.1.1.37)
6666666.653812.peg.503	Undecaprenyl-diphosphatase (EC 3.6.1.27)
6666666.653812.peg.2198	Thymidylate kinase (EC 2.7.4.9)
6666666.653812.peg.723	4-hydroxy-tetrahydrodipicolinate synthase (EC 4.3.3.7)
6666666.653812.peg.5153	Aldehyde dehydrogenase (EC 1.2.1.3)
6666666.653812.peg.5123	Aldehyde dehydrogenase (EC 1.2.1.3)
6666666.653812.peg.1292	Aldehyde dehydrogenase (EC 1.2.1.3)
6666666.653812.peg.2425	Aldehyde dehydrogenase (EC 1.2.1.3)
6666666.653812.peg.1085	Aldehyde dehydrogenase (EC 1.2.1.3)
6666666.653812.peg.3324	Aldehyde dehydrogenase (EC 1.2.1.3)
6666666.653812.peg.4722	Aldehyde dehydrogenase (EC 1.2.1.3)
6666666.653812.peg.2039	Aldehyde dehydrogenase (EC 1.2.1.3); Probable coniferyl aldehyde dehydrogenase (EC 1.2.1.68)
6666666.653812.peg.4033	Aldehyde dehydrogenase (EC 1.2.1.3)
6666666.653812.peg.4936	Aldehyde dehydrogenase (EC 1.2.1.3)
6666666.653812.peg.4100	Phosphopantothenoylcysteine decarboxylase (EC 4.1.1.36) / Phosphopantothenoylcysteine synthetase (EC 6.3.2.5)
6666666.653812.peg.1638	Phosphopantothenoylcysteine decarboxylase (EC 4.1.1.36) / Phosphopantothenoylcysteine synthetase (EC 6.3.2.5)
6666666.653812.peg.574	Malate dehydrogenase (EC 1.1.1.37)
6666666.653812.peg.2176	dTDP-4-dehydrorhamnose 3,5-epimerase (EC 5.1.3.13)
6666666.653812.peg.2641	Ribulose-phosphate 3-epimerase (EC 5.1.3.1)
6666666.653812.peg.2587	3-isopropylmalate dehydratase large subunit (EC 4.2.1.33)
6666666.653812.peg.2589	3-isopropylmalate dehydratase small subunit (EC 4.2.1.33)
6666666.653812.peg.1951	Fumarate hydratase class II (EC 4.2.1.2)
6666666.653812.peg.4274	Fumarate hydratase class I, aerobic (EC 4.2.1.2)
6666666.653812.peg.2596	Cob(I)alamin adenosyltransferase (EC 2.5.1.17)
6666666.653812.peg.2280	NADP-dependent malic enzyme (EC 1.1.1.40)
6666666.653812.peg.872	NADP-dependent malic enzyme (EC 1.1.1.40)
6666666.653812.peg.2378	5,10-methylenetetrahydrofolate reductase (EC 1.5.1.20)
6666666.653812.peg.948	NAD kinase (EC 2.7.1.23)
6666666.653812.peg.245	Alcohol dehydrogenase (EC 1.1.1.1)
6666666.653812.peg.4723	Alcohol dehydrogenase (EC 1.1.1.1)
6666666.653812.peg.295	Alcohol dehydrogenase (EC 1.1.1.1)
6666666.653812.peg.2426	Alcohol dehydrogenase (EC 1.1.1.1)
6666666.653812.peg.1231	Pyrroline-5-carboxylate reductase (EC 1.5.1.2)
6666666.653812.peg.5054	Pyrroline-5-carboxylate reductase (EC 1.5.1.2)
6666666.653812.peg.2252	Pyrroline-5-carboxylate reductase (EC 1.5.1.2)
6666666.653812.peg.2925	N-succinyl-L,L-diaminopimelate desuccinylase (EC 3.5.1.18)
6666666.653812.peg.2084	Ammonium transporter
6666666.653812.peg.2944	Phosphoribosylaminoimidazole-succinocarboxamide synthase (EC 6.3.2.6)
6666666.653812.peg.1768	Alanine dehydrogenase (EC 1.4.1.1)
6666666.653812.peg.3785	Glutathione reductase (EC 1.8.1.7)
6666666.653812.peg.1104	Cysteine desulfurase (EC 2.8.1.7)
6666666.653812.peg.421	Cysteine desulfurase (EC 2.8.1.7)
6666666.653812.peg.4101	Cysteine desulfurase (EC 2.8.1.7)
6666666.653812.peg.452	3-isopropylmalate dehydrogenase (EC 1.1.1.85)
6666666.653812.peg.3831	CTP synthase (EC 6.3.4.2)
6666666.653812.peg.2276	Adenosine deaminase (EC 3.5.4.4)
6666666.653812.peg.671	Sulfite reductase [NADPH] hemoprotein beta-component (EC 1.8.1.2)
6666666.653812.peg.1704	Lysine 2,3-aminomutase (EC 5.4.3.2)
6666666.653812.peg.2277	Phosphopentomutase (EC 5.4.2.7)
6666666.653812.peg.4173	Phosphoribosylamine--glycine ligase (EC 6.3.4.13)
6666666.653812.peg.2919	Adenine deaminase (EC 3.5.4.2)
6666666.653812.peg.416	AMP nucleosidase (EC 3.2.2.4)
6666666.653812.peg.935	Choloylglycine hydrolase (EC 3.5.1.24)
6666666.653812.peg.4053	Ornithine cyclodeaminase (EC 4.3.1.12)
6666666.653812.peg.4816	Ornithine cyclodeaminase (EC 4.3.1.12)
6666666.653812.peg.4855	L-lactate dehydrogenase
6666666.653812.peg.4224	L-lactate dehydrogenase
6666666.653812.peg.5244	L-lactate dehydrogenase
6666666.653812.peg.5227	L-lactate dehydrogenase
6666666.653812.peg.1775	Ferrous iron transport peroxidase EfeB
6666666.653812.peg.1776	Ferrous iron transport periplasmic protein EfeO, contains peptidase-M75 domain and (frequently) cupredoxin-like domain
6666666.653812.peg.1774	Ferrous iron transport periplasmic protein EfeO, contains peptidase-M75 domain and (frequently) cupredoxin-like domain
6666666.653812.peg.972	Proline dehydrogenase (EC 1.5.5.2) / Delta-1-pyrroline-5-carboxylate dehydrogenase (EC 1.2.1.88)
6666666.653812.peg.254	Ribokinase (EC 2.7.1.15)
6666666.653812.peg.2367	Ribokinase (EC 2.7.1.15)
6666666.653812.peg.3806	Acetolactate synthase
6666666.653812.peg.1982	Cytochrome c oxidase polypeptide I (EC 1.9.3.1)
6666666.653812.peg.3117	Cytochrome c oxidase polypeptide I (EC 1.9.3.1)
6666666.653812.peg.4484	Cytochrome c oxidase polypeptide II (EC 1.9.3.1)
6666666.653812.peg.4480	Cytochrome c oxidase polypeptide III (EC 1.9.3.1)
6666666.653812.peg.4460	GTP cyclohydrolase I (EC 3.5.4.16) type 2
6666666.653812.peg.2287	NADH-ubiquinone oxidoreductase chain N (EC 1.6.5.3)
6666666.653812.peg.2306	NADH-ubiquinone oxidoreductase chain D (EC 1.6.5.3)
6666666.653812.peg.2298	NADH-ubiquinone oxidoreductase chain G (EC 1.6.5.3)
6666666.653812.peg.2308	NADH-ubiquinone oxidoreductase chain B (EC 1.6.5.3)
6666666.653812.peg.2302	NADH-ubiquinone oxidoreductase chain F (EC 1.6.5.3)
6666666.653812.peg.2307	NADH-ubiquinone oxidoreductase chain C (EC 1.6.5.3)
6666666.653812.peg.2296	NADH-ubiquinone oxidoreductase chain H (EC 1.6.5.3)
6666666.653812.peg.2290	NADH-ubiquinone oxidoreductase chain K (EC 1.6.5.3)
6666666.653812.peg.2294	NADH-ubiquinone oxidoreductase chain I (EC 1.6.5.3)
6666666.653812.peg.2289	NADH-ubiquinone oxidoreductase chain L (EC 1.6.5.3)
6666666.653812.peg.2304	NADH-ubiquinone oxidoreductase chain E (EC 1.6.5.3)
6666666.653812.peg.2305	NADH-ubiquinone oxidoreductase chain E (EC 1.6.5.3)
6666666.653812.peg.2309	NADH ubiquinone oxidoreductase chain A (EC 1.6.5.3)
6666666.653812.peg.2288	NADH-ubiquinone oxidoreductase chain M (EC 1.6.5.3)
6666666.653812.peg.2291	NADH-ubiquinone oxidoreductase chain J (EC 1.6.5.3)
6666666.653812.peg.4583	Glutaryl-CoA dehydrogenase (EC 1.3.8.6)
6666666.653812.peg.1355	Formate--tetrahydrofolate ligase (EC 6.3.4.3)
6666666.653812.peg.1612	Formate--tetrahydrofolate ligase (EC 6.3.4.3)
6666666.653812.peg.4006	NADP-specific glutamate dehydrogenase (EC 1.4.1.4)
6666666.653812.peg.4184	Mannose-1-phosphate guanylyltransferase (EC 2.7.7.13) / Mannose-6-phosphate isomerase (EC 5.3.1.8)
6666666.653812.peg.1611	Nicotinate-nucleotide adenylyltransferase (EC 2.7.7.18)
6666666.653812.peg.1356	Nicotinate-nucleotide adenylyltransferase (EC 2.7.7.18)
6666666.653812.peg.1898	Bis(5'-nucleosyl)-tetraphosphatase (asymmetrical) (EC 3.6.1.17)
6666666.653812.peg.2763	Bis(5'-nucleosyl)-tetraphosphatase (asymmetrical) (EC 3.6.1.17)
6666666.653812.peg.3077	Ribonucleotide reductase of class III (anaerobic), large subunit (EC 1.17.4.2)
6666666.653812.peg.4865	Succinyl-CoA:3-ketoacid-coenzyme A transferase subunit B (EC 2.8.3.5)
6666666.653812.peg.4864	Succinyl-CoA:3-ketoacid-coenzyme A transferase subunit A (EC 2.8.3.5)
6666666.653812.peg.5270	3-hydroxybutyrate dehydrogenase (EC 1.1.1.30)
6666666.653812.peg.3684	3-hydroxybutyrate dehydrogenase (EC 1.1.1.30)
6666666.653812.peg.960	3-hydroxybutyrate dehydrogenase (EC 1.1.1.30)
6666666.653812.peg.1864	5-aminolevulinate synthase (EC 2.3.1.37)
6666666.653812.peg.3995	Cystathionine beta-synthase (EC 4.2.1.22)
6666666.653812.peg.1500	Branched-chain amino acid aminotransferase (EC 2.6.1.42)
6666666.653812.peg.2671	Branched-chain amino acid aminotransferase (EC 2.6.1.42)
6666666.653812.peg.730	Histidine ammonia-lyase (EC 4.3.1.3)
6666666.653812.peg.3754	Hydroxymethylglutaryl-CoA lyase (EC 4.1.3.4)
6666666.653812.peg.3780	Low-specificity L-threonine aldolase (EC 4.1.2.48)
6666666.653812.peg.1297	Manganese ABC transporter, periplasmic-binding protein SitA
6666666.653812.peg.1294	Manganese ABC transporter, inner membrane permease protein SitD
6666666.653812.peg.1295	Manganese ABC transporter, inner membrane permease protein SitC
6666666.653812.peg.1296	Manganese ABC transporter, ATP-binding protein SitB
6666666.653812.peg.877	NAD synthetase (EC 6.3.1.5) / Glutamine amidotransferase chain of NAD synthetase
6666666.653812.peg.3996	Potassium efflux system KefA protein / Small-conductance mechanosensitive channel
6666666.653812.peg.2959	ATP synthase F0 sector subunit b (EC 3.6.3.14)
6666666.653812.peg.2960	ATP synthase F0 sector subunit b' (EC 3.6.3.14)
6666666.653812.peg.2961	ATP synthase F0 sector subunit c (EC 3.6.3.14)
6666666.653812.peg.2962	ATP synthase F0 sector subunit a (EC 3.6.3.14)
6666666.653812.peg.2963	ATP synthase protein I
6666666.653812.peg.4025	Dihydrolipoamide acetyltransferase component of pyruvate dehydrogenase complex (EC 2.3.1.12)
6666666.653812.peg.4026	Pyruvate dehydrogenase E1 component beta subunit (EC 1.2.4.1)
6666666.653812.peg.4027	Pyruvate dehydrogenase E1 component alpha subunit (EC 1.2.4.1)
6666666.653812.peg.5152	D-malate dehydrogenase [decarboxylating] (EC 1.1.1.83)
6666666.653812.peg.983	Acetyl-CoA synthetase (EC 6.2.1.1)
